# Supplementary material for: High-Dose Vitamin E Supplementation Can Alleviate the Negative Effect of Subacute Ruminal Acidosis in Dairy Cows
Source: MDPI journal article supplement (doi:10.3390/ani13030486), 2023-01-31
Supplement: s1 [file s1]

**Table S1.** Major differential metabolites in serum

| Metabolite       | FC <sup>1</sup> | <i>p</i> <sup>2</sup> | VIP <sup>3</sup> | Up/Down |
|------------------|-----------------|-----------------------|------------------|---------|
| CON-HG           |                 |                       |                  |         |
| Salicylic acid   | 2.44            | <0.01                 | 1.61             | up      |
| Catechol         | 1.79            | 0.01                  | 1.30             | up      |
| 4-Methylcatechol | 2.06            | 0.03                  | 1.49             | up      |
| 4-Methylphenol   | 1.82            | <0.01                 | 1.63             | up      |
| o-Cresol         | 1.55            | 0.01                  | 1.60             | up      |
| HG.vs.HGE        |                 |                       |                  |         |
| Guanine          | 0.40            | 0.03                  | 1.78             | down    |
| Hypoxanthine     | 0.42            | 0.04                  | 1.71             | down    |
| Guanosine        | 0.04            | <0.01                 | 2.78             | down    |
| Inosine          | 0.53            | 0.04                  | 1.66             | down    |
| 3'-AMP           | 0.64            | 0.06                  | 1.15             | down    |

<sup>1</sup>FC = fold change is the ratio of the mean values of all biological repeated quantitative values of each metabolite in the test period.

<sup>2</sup>*p*-value represents the significance level of difference between the two groups

<sup>3</sup>VIP refers to the variable projection importance of the first principal component of the PLS-DA model

**Table S2.** Common differential metabolites of CON-HG and HG-HGE

| Metabolite                                                           | CON-HG          |                       |                  | HG-HGE |          |      |
|----------------------------------------------------------------------|-----------------|-----------------------|------------------|--------|----------|------|
|                                                                      | FC <sup>1</sup> | <i>p</i> <sup>2</sup> | VIP <sup>3</sup> | FC     | <i>p</i> | VIP  |
| N-Phenylacetylglutamine                                              | 2.92            | <0.01                 | 1.82             | 0.66   | 0.03     | 1.08 |
| 1-(4-benzylpiperazino)-2-(pyridin-2-ylamino)propan-1-one             | 0.61            | <0.01                 | 1.30             | 0.62   | <0.01    | 1.45 |
| 4-Methylcatechol                                                     | 2.06            | 0.03                  | 1.49             | 0.46   | 0.02     | 2.06 |
| Choline                                                              | 1.79            | 0.03                  | 1.49             | 0.58   | 0.02     | 1.89 |
| 3-Methyladipic acid                                                  | 0.37            | <0.01                 | 1.87             | 2.05   | 0.01     | 2.02 |
| 4-Methylphenol                                                       | 1.82            | <0.01                 | 1.63             | 0.50   | <0.01    | 2.49 |
| 2-Mercaptobenzothiazole                                              | 0.04            | <0.01                 | 2.28             | 2.46   | 0.04     | 1.03 |
| P-Coumaroyl Agmatine                                                 | 2.17            | 0.01                  | 1.26             | 1.51   | 0.02     | 1.12 |
| N-{4-[(2R,3R)-3-(Hydroxymethyl)-5-oxo-2-morpholinyl]phenyl}acetamide | 2.88            | 0.02                  | 1.60             | 0.51   | <0.01    | 1.63 |
| DL-o-Tyrosine                                                        | 0.20            | <0.01                 | 1.91             | 3.18   | 0.02     | 1.75 |
| 2-[(3-methylbenzo[b]thiophen-2-yl)carbonyl]benzoic acid              | 2.76            | 0.02                  | 1.47             | 0.33   | 0.04     | 1.77 |
| Oxadipic Acid                                                        | 0.30            | <0.01                 | 1.82             | 2.83   | 0.01     | 2.13 |
| Ureidoisobutyric Acid                                                | 0.15            | <0.01                 | 2.08             | 2.95   | 0.01     | 1.53 |
| Stearic acid                                                         | 2.03            | <0.01                 | 1.56             | 0.51   | 0.05     | 1.64 |
| D-Phenylalanine                                                      | 0.16            | <0.01                 | 2.08             | 3.02   | 0.02     | 1.49 |
| Cystine                                                              | 0.41            | <0.01                 | 2.03             | 2.17   | <0.01    | 2.18 |
| 11-Epiprostaglandin E1                                               | 1.60            | 0.04                  | 1.25             | 0.57   | 0.04     | 1.87 |
| trans-3-Hydroxycotinine                                              | 0.27            | <0.01                 | 2.38             | 1.50   | 0.01     | 1.05 |
| L-Tryptophan                                                         | 0.23            | 0.01                  | 1.70             | 3.42   | 0.02     | 1.92 |
| 11(Z),14(Z),17(Z)-Eicosatrienoic acid                                | 0.50            | <0.01                 | 1.71             | 2.11   | <0.01    | 2.45 |
| LPC 10:0                                                             | 0.52            | 0.02                  | 1.03             | 3.10   | <0.01    | 2.51 |
| octadec-9-ynoic acid                                                 | 0.64            | 0.01                  | 1.12             | 2.36   | <0.01    | 2.95 |
| (+)-alpha-Lipoic acid                                                | 0.45            | 0.01                  | 1.57             | 1.89   | 0.03     | 1.74 |
| Lysopa 18:0                                                          | 1.81            | <0.01                 | 1.22             | 0.35   | <0.01    | 2.56 |
| LPC 13:0                                                             | 0.50            | 0.03                  | 1.23             | 1.93   | 0.03     | 1.66 |
| Ethyl 3-methyl-5-[(phenoxycarbonyl)amino]isothiazole-4-carboxylate   | 1.53            | 0.03                  | 1.43             | 0.56   | 0.01     | 2.33 |
| 3,8,9-trihydroxy-10-propyl-3,4,5,8,9,10-hexahydro-2H-oxecin-2-one    | 0.44            | 0.02                  | 1.38             | 2.26   | 0.02     | 2.00 |
| NNK                                                                  | 2.21            | <0.01                 | 1.11             | 1.98   | <0.01    | 1.54 |
| L-Glutathione (reduced)                                              | 1.74            | <0.01                 | 1.77             | 0.63   | <0.01    | 2.12 |

<sup>1</sup>FC is the ratio of the mean values of all biological repeated quantitative values of each metabolite in the test period.

<sup>2</sup>*p*-value represents the significance level of difference between the two groups

<sup>3</sup>VIP refers to the variable projection importance of the first principal component of the PLS-DA model

**Table S3.** Effects of vitamin E on rumen microflora phylum levels induced by high concentration in subacute ruminal acidosis cows

| Phylum                       | Dietary treatments <sup>1</sup> |       |       | SEM <sup>2</sup> | p-Value    |            |
|------------------------------|---------------------------------|-------|-------|------------------|------------|------------|
|                              | CON                             | HG    | HGE   |                  | CON vs. HG | HG vs. HGE |
| <i>Bacteroidota</i>          | 48.18                           | 48.13 | 45.68 | 0.75             | 0.98       | 0.20       |
| <i>Firmicutes</i>            | 43.21                           | 35.98 | 32.70 | 1.64             | 0.04       | 0.30       |
| <i>Proteobacteria</i>        | 1.12                            | 5.10  | 13.44 | 1.56             | 0.06       | <0.01      |
| <i>Spirochaetota</i>         | 1.66                            | 2.14  | 1.02  | 0.22             | 0.34       | 0.04       |
| <i>Actinobacteriota</i>      | 1.03                            | 2.72  | 1.83  | 0.29             | 0.01       | 0.15       |
| <i>Fibrobacterota</i>        | 0.88                            | 1.29  | 0.46  | 0.17             | 0.29       | 0.04       |
| <i>Cyanobacteria</i>         | 0.20                            | 0.61  | 0.46  | 0.12             | 0.18       | 0.62       |
| <i>Euryarchaeota</i>         | 1.04                            | 0.77  | 0.59  | 0.09             | 0.18       | 0.37       |
| <i>unidentified_Bacteria</i> | 0.91                            | 0.91  | 0.92  | 0.02             | 0.96       | 0.96       |
| <i>Desulfobacterota</i>      | 0.11                            | 0.09  | 0.11  | 0.01             | 0.44       | 0.58       |

<sup>1</sup> CON = Control stage, HG = High-grain diet, HGE = High vitamin E diet.

<sup>2</sup> SEM standard error of the mean.

**Table S4.** Effects of vitamin E on genus level of rumen microflora induced by high concentration in subacute ruminal acidosis cows

| Genus                                | Dietary treatments <sup>1</sup> |       |       | SEM <sup>2</sup> | p-Value    |            |
|--------------------------------------|---------------------------------|-------|-------|------------------|------------|------------|
|                                      | CON                             | HG    | HGE   |                  | CON vs. HG | HG vs. HGE |
| <i>Prevotella</i>                    | 19.45                           | 25.12 | 24.55 | 1.01             | 0.01       | 0.78       |
| <i>Succinivibrionaceae_UCG-001</i>   | 0.33                            | 3.94  | 10.55 | 1.23             | 0.01       | <0.01      |
| <i>Rikenellaceae_RC9_gut_group</i>   | 7.69                            | 4.20  | 3.63  | 0.54             | <0.01      | 0.43       |
| <i>Treponema</i>                     | 1.61                            | 2.11  | 0.98  | 0.22             | 0.32       | 0.04       |
| <i>Succiniclasicum</i>               | 3.62                            | 2.50  | 5.30  | 0.49             | 0.29       | 0.02       |
| <i>Ruminococcus</i>                  | 7.39                            | 1.29  | 3.88  | 0.47             | <0.01      | 0.38       |
| <i>Fibrobacter</i>                   | 0.88                            | 0.61  | 0.46  | 0.17             | 0.30       | 0.04       |
| <i>Olsenella</i>                     | 0.41                            | 1.28  | 0.35  | 0.16             | 0.01       | 0.01       |
| <i>Pseudoscardovia</i>               | 0.08                            | 0.92  | 0.86  | 0.16             | 0.03       | 0.87       |
| <i>unidentified_Chloroplast</i>      | 0.12                            | 0.57  | 0.36  | 0.12             | 0.15       | 0.48       |
| <i>Succinivibrionaceae_UCG-002</i>   | 0.41                            | 0.51  | 1.08  | 0.12             | 0.71       | 0.06       |
| <i>Christensenellaceae_R-7_group</i> | 3.92                            | 1.93  | 1.29  | 0.32             | <0.01      | 0.06       |
| <i>Acetitomaculum</i>                | 3.46                            | 2.61  | 1.93  | 0.20             | 0.02       | 0.04       |
| <i>Prevotellaceae_UCG-001</i>        | 2.10                            | 1.88  | 1.93  | 0.11             | 0.44       | 0.88       |
| <i>unidentified_Mitochondria</i>     | 0.00                            | 0.02  | 0.42  | 0.09             | 0.93       | 0.07       |
| <i>NK4A214_group</i>                 | 2.79                            | 1.51  | 1.09  | 0.21             | <0.01      | 0.07       |
| <i>Selenomonas</i>                   | 0.57                            | 1.34  | 0.73  | 0.10             | <0.01      | <0.01      |
| <i>Lachnospiraceae_NK3A20_group</i>  | 1.92                            | 1.88  | 1.09  | 0.12             | 0.82       | <0.01      |
| <i>Saccharofermentans</i>            | 2.17                            | 1.47  | 1.18  | 0.14             | 0.01       | 0.18       |
| <i>Prevotellaceae_NK3B31_group</i>   | 1.26                            | 1.31  | 0.87  | 0.06             | 0.52       | <0.01      |
| <i>CAG-352</i>                       | 0.41                            | 0.19  | 0.39  | 0.04             | 0.02       | 0.03       |
| <i>Methanobrevibacter</i>            | 0.90                            | 0.70  | 0.55  | 0.07             | 0.25       | 0.42       |
| <i>Bifidobacterium</i>               | 0.28                            | 0.35  | 0.37  | 0.03             | 0.47       | 0.82       |
| <i>Dialister</i>                     | 0.10                            | 0.56  | 0.21  | 0.06             | <0.01      | <0.01      |
| <i>Shuttleworthia</i>                | 0.37                            | 0.73  | 0.79  | 0.07             | 0.01       | 0.63       |
| <i>Ruminobacter</i>                  | 0.21                            | 0.34  | 0.20  | 0.03             | 0.09       | 0.06       |
| <i>Enterobacter</i>                  | 0.00                            | 0.00  | 0.08  | 0.03             | 0.98       | 0.25       |
| <i>Erysipelotrichaceae_UCG-007</i>   | 0.03                            | 0.14  | 0.29  | 0.04             | 0.15       | 0.04       |
| <i>Butyrivibrio</i>                  | 1.10                            | 0.81  | 0.49  | 0.07             | <0.01      | <0.01      |
| <i>UCG-005</i>                       | 1.14                            | 0.59  | 0.49  | 0.09             | <0.01      | 0.33       |
| <i>Others</i>                        | 35.27                           | 34.77 | 33.64 | 0.34             | 0.52       | 0.15       |

<sup>1</sup> CON = Control stage, HG = High-grain diet, HGE = High vitamin E diet.

<sup>2</sup> SEM standard error of the mean.
